# Supplementary material for: Gene Expression Signature in Endemic Osteoarthritis by Microarray Analysis
Source: Int J Mol Sci. 2015 May 19;16(5):11465–81. doi: 10.3390/ijms160511465 (PMC4463711; doi:10.3390/ijms160511465)
Supplement: Supplementary file 1 [file ijms-16-11465-s001.xlsx]

## Sheet: Sheet1
name
A_32_P222060
A2ML1
ABCC13
ABI3BP
abl1 v-abl Abelson
ACSL6
AF075108
AF116618
AF257098
ALDH5A1
AM181370
a-MYH6
ANAPC1
APPBP1
AQP1
ATR
ATXN3
armet
AW966840
B3GNT1
BAX
BC006998
BC009749
BC020341
BC040412
BCAT1
BCL2L1
BIRC3
BQ364306
C18orf10
gapdh
C1orf103
C1orf64
C20orf54
C22orf13
C4B
CACNG6
CD3G
COL1A1
CR598046
CSDC2
CSGALNACT
CTSC
actb
CYB5A
CYB5R3
CYP2B6
DIO2
DIO3
DMD
DNAJB2
DPCD
DTWD1
DYS
EBI2
EFNA1
b2m
EGR1
ENSA
ENST00000312412
ENST00000357520
ENST00000358466
EPB49
ERH
EYA4
F11R
FABP4
FAM104A
FAM46C
mrpl9
FBN1
FBXO15
FEM1A
FGFR1OP2
FKBP9
FLJ11292
FSIP2
FZD1
GDF5
GLRX5
GPR20
GPRC5C
mrps23
Gpx1
GPX2
GPX4
GPX6
GPX7
GSTT2
HAPLN1
HBA2
HIPK2
HIRIP5
HLA-C
HRB2
cox7c
IDH2
IGF2BP2
IGFBP4
IKZF5
IL-2
ITSN2
KIAA1430
KLRC1
L25664
LDB1
LEF1
LOC100134229
ptma
LYAR
M19503
MCART3P
MFSD3
MGAT3
MKRN1
MLL5
MLP/CSRP3
MUTYH
MYBPC3
NUCKS1
OPTN
ubb
PAGE2B
PDE4B
PDE8B
PGC
PIM2
PLN
PPM1A
PTN
RASD1
REXO2
RIMS4
RMND5A
RNF34
RP5-821D11.2
SEZ6L2
SH3GL3
SIGLEC8
SLC14A1
SMAD9
SNAI2
SPATA22
SRP19
SSBP1
STK11
SYNPO2L
T12590
THBS1
THC2512545
THC2549728
THC2555689
THC2559002
THC2590641
THC2663297
THC2686750
TNFAIP6
TNFRSF11B
TNFSF11
TNNT2
TSPAN5
TTC25
ZDHHC2
ZIC5
ZNF208
ZNF43
ZNF493
ZNF562
ZNF714
